# Supplementary material
Source: PubMed Central journal article supplement (PMC3998877)
Supplement: NIHMS56201-supplement-1.pdf [file NIHMS56201-supplement-1.pdf]

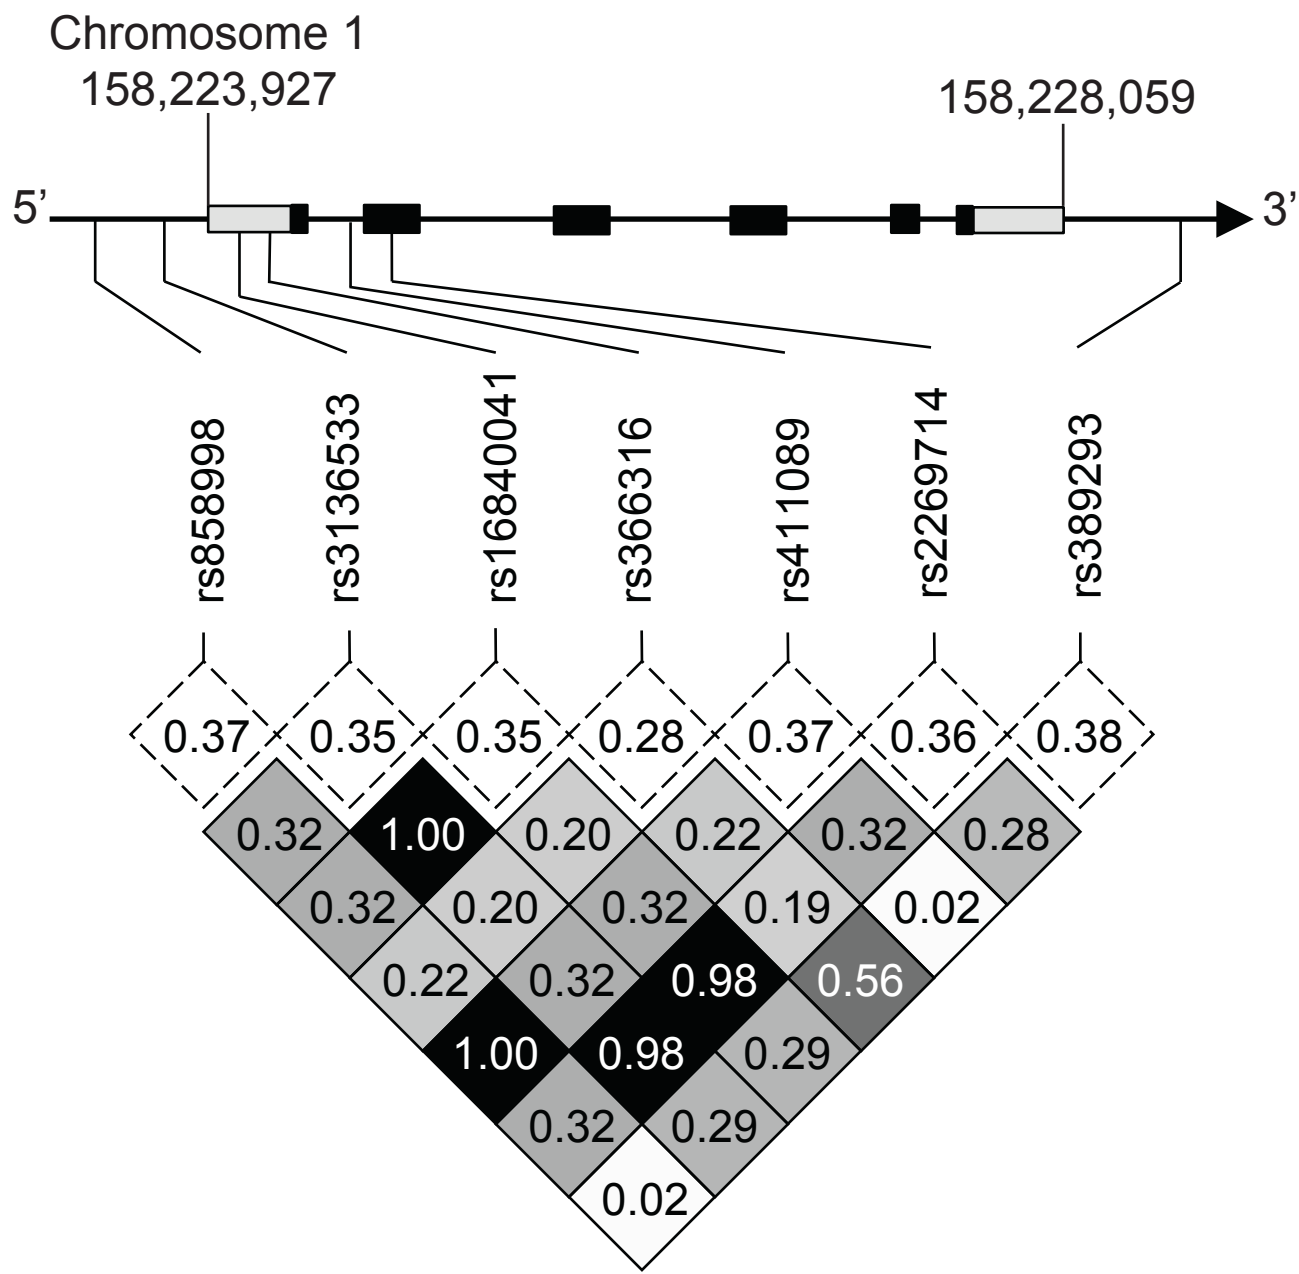

**Supplementary Figure 1.** Linkage disequilibrium plots of CD1A SNPs in HapMap populations. CD1A consists of six exons (■) and two untranslated regions (▒) on chromosome 1. Shown are minor allele frequencies (dotted box) and R<sup>2</sup> coefficients (shaded box) for SNPs spanning CD1A ± 10kB flanking regions in CHB/JPT HapMap populations.
